# Supplementary material for: Quantifying resilience of humans and other animals
Source: PubMed Central journal article supplement — Proc Natl Acad Sci U S A. 2018 Oct 29;115(47):11883–90. doi: 10.1073/pnas.1810630115 (PMC6255191; doi:10.1073/pnas.1810630115), 2018-10-29
Supplement: pnas.1810630115.sapp.pdf [file pnas.1810630115.sapp.pdf]

# Supplementary Material to

## Systemic resilience in humans and other animals

### Scheffer et al.

Table 1. Examples of critical transitions between alternative states in elements of the human organism

This is a compilation of chronic dynamical diseases characterized by acute and reversible transitions between a preferable state with no or few symptoms, and an alternative state of increased disease activity. (From Olde Rikkert MGM, *et al.* (2016) Slowing Down of Recovery as Generic Risk Marker for Acute Severity Transitions in Chronic Diseases. *Critical Care Medicine* 44(3):601-606.)

| System                                                                                             | Disease                                  | Transitional state                  |
|----------------------------------------------------------------------------------------------------|------------------------------------------|-------------------------------------|
| Chronic diseases with irregular attacks or exacerbations alternating with periods without symptoms |                                          |                                     |
| Brain (neurologic disease)                                                                         | Epilepsy                                 | Seizures (various types)            |
|                                                                                                    | Migraine                                 | Migraine attack                     |
|                                                                                                    | Cluster headache                         | Cluster headache attack             |
|                                                                                                    | Narcolepsy                               | Sleep attacks                       |
|                                                                                                    | Trigeminal neuralgia                     | Attacks of facial pain              |
| Brain (psychiatric diseases)                                                                       | Bipolar mood disorder<br>'Rapid cyclers' | Depressed or manic episode          |
| Nerve-Muscle                                                                                       | Periodic paralysis                       | Systemic paralysis                  |
| Heart                                                                                              | Paroxysmal atrial fibrillation           | Atrial fibrillation state           |
|                                                                                                    | Long QT syndrome                         | Torsade de Pointes                  |
| Chronic diseases with exacerbations and episodes with limited symptoms                             |                                          |                                     |
| Brain (neurologic disease)                                                                         | Multiple sclerosis                       | Relapse (sometimes reversible)      |
| Brain (psychiatric diseases)                                                                       | Schizophrenia                            | Psychotic episode                   |
|                                                                                                    | Major depression                         | Depressed state                     |
| Renal system                                                                                       | Chronic renal failure                    | Fluid volume disturbances           |
| Cardiovascular system                                                                              | Heart failure                            | Acute cardiac decompensation        |
|                                                                                                    | Chronic autonomic failure                | Syncope                             |
| Lungs                                                                                              | Asthma                                   | Asthma Attack,<br>COPD exacerbation |

|                          |                                                                                            |                                                                                 |
|--------------------------|--------------------------------------------------------------------------------------------|---------------------------------------------------------------------------------|
|                          | Chronic Obstructive Pulmonary Disease<br>Sleep apnea syndrome<br>Cheyne-Stokes respiration | Apnea episode<br>Cheyne stokes breathing                                        |
| Hematologic system       | Periodic chronic myeloid leukemia                                                          | Periodic leukocytosis                                                           |
| Immune system            | Familial Mediterranean Fever                                                               | Fever episode                                                                   |
| Gastro-intestinal system | Crohn's disease<br>Ulcerative colitis<br>Irritable Bowel Syndrome                          | Relapse of inflammation<br>Relapse of inflammation<br>Attacks of abdominal pain |

Table 2. Examples of evidence for critical slowing before in physiological transitions

Slowing down of recovery rate and its indicators, increased variance and increased autocorrelation as detected in experimental and empirical data.

| Field             | Indicator            | Transition                    | Refs.   |
|-------------------|----------------------|-------------------------------|---------|
| <b>Physiology</b> | Recovery rate        | Human coordinated motion      | (1, 2)  |
|                   | Recovery rate        | Neural firing                 | (3)     |
|                   | Recovery rate        | Blood pressure                | (4-6)   |
| <b>Mood</b>       | Temporal correlation | Clinical depression           | (7-10)  |
| <b>Epilepsy</b>   | Correlation          | Seizures                      | (11)    |
|                   | Variance             | Seizures                      | (12)    |
|                   | Recovery rate        | Seizures                      | (13)    |
| <b>Migraine</b>   | Recovery rate        | Cortical spreading depression | (14-16) |

1. Kelso JAS, Scholz JP, & Schöner G (1986) Nonequilibrium phase transitions in coordinated biological motion: critical fluctuations. *Physics Letters A* 118(6):279-284.
2. Scholz JP, Kelso JAS, & Schöner G (1987) Nonequilibrium phase transitions in coordinated biological motion: Critical slowing down and switching time. *Physics Letters A* 123(8):390-394.
3. Matsumoto G & Kunisawa T (1978) Critical slowing-down near transition region from resting to time-ordered states in squid giant axons. *Journal of the Physical Society of Japan* 44(3):1047-1048.
4. Lagro J, *et al.* (2013) Impaired systolic blood pressure recovery directly after standing predicts mortality in older falls clinic patients. *Journals of Gerontology Series A: Biomedical Sciences and Medical Sciences* 69(4):471-478.
5. Saal D, Thijs R, & Van Dijk J (2016) Tilt table testing in neurology and clinical neurophysiology. *Clinical Neurophysiology* 127(2):1022-1030.
6. Le V-V, Mitiku T, Sungar G, Myers J, & Froelicher V (2008) The blood pressure response to dynamic exercise testing: a systematic review. *Progress in cardiovascular diseases* 51(2):135-160.
7. van de Leemput IA, *et al.* (2014) Critical slowing down as early warning for the onset and termination of depression. *Proceedings of the National Academy of Sciences* 111(1):87-92.
8. Wichers M, Groot PC, Psychosystems E, & Group E (2016) Critical slowing down as a personalized early warning signal for depression. *Psychotherapy and psychosomatics* 85(2):114-116.
9. Nelson B, McGorry PD, Wichers M, Wigman JT, & Hartmann JA (2017) Moving from static to dynamic models of the onset of mental disorder: a review. *JAMA psychiatry* 74(5):528-534.
10. Hofmann SG, Curtiss J, & McNally RJ (2016) A complex network perspective on clinical science. *Perspectives on Psychological Science* 11(5):597-605.
11. Meisel C & Kuehn C (2012) Scaling effects and spatio-temporal multilevel dynamics in epileptic seizures. *PLoS ONE* 7(2).
12. McSharry PE, Smith LA, & Tarassenko L (2003) Prediction of epileptic seizures: are nonlinear methods relevant? *Nature Medicine* 9(3):241-242.
13. Kramer MA, *et al.* (2012) Human seizures self-terminate across spatial scales via a critical transition. *Proceedings of the National Academy of Sciences* 109(51):21116-21121.
14. Scheffer M, van den Berg A, & Ferrari MD (2013) Migraine Strikes as Neuronal Excitability Reaches a Tipping Point. *PLoS ONE* 8(8):art. no. e72514.
15. Coppola G, *et al.* (2007) Interictal abnormalities of gamma band activity in visual evoked responses in migraine: an indication of thalamocortical dysrhythmia? *Cephalalgia* 27(12):1360-1367.
16. Bjørk M, Stovner L, Hagen K, & Sand T (2011) What initiates a migraine attack? Conclusions from four longitudinal studies of quantitative EEG and steady-state visual-evoked potentials in migraineurs. *Acta Neurologica Scandinavica* 124(s191):56-63.
